# Supplementary material for: Perceived Economic Values of Cultural Ecosystem Services in Green and Blue Spaces of 98 Urban Wetland Parks in Jiangxi, China
Source: MDPI journal article supplement (doi:10.3390/f14020273), 2023-01-31
Supplement: s1 [file s1]

**Table S1.** List of names and geographical information for urban wetland parks in Jiangxi province, China.

| Order | Longitude (°) | Latitude (°) | Park name                        | Number of photos |
|-------|---------------|--------------|----------------------------------|------------------|
| 1     | 115.86        | 28.68        | Ganjiang Citizens                | 23               |
| 2     | 115.83        | 28.64        | Honggu Shoal Wetland             | 15               |
| 3     | 115.83        | 28.63        | Riverside Chinese Rose           | 16               |
| 4     | 115.89        | 28.62        | Elephant Lake Wetland            | 19               |
| 5     | 115.91        | 28.61        | Eight Hermits Mei Lake           | 14               |
| 6     | 115.91        | 28.68        | Nanchang People                  | 17               |
| 7     | 115.98        | 28.70        | Aixi Lake Forest Wetland         | 23               |
| 8     | 116.06        | 28.67        | Yao Lake Wetland                 | 19               |
| 9     | 115.93        | 28.55        | Chengbi Lake                     | 19               |
| 10    | 115.73        | 28.71        | Lingxiu Lake                     | 16               |
| 11    | 115.72        | 28.77        | Meiling National Forest          | 17               |
| 12    | 115.82        | 28.86        | Barrow Hill Ecology              | 16               |
| 13    | 115.81        | 28.42        | Houtian Sands                    | 22               |
| 14    | 116.00        | 28.37        | Phenix Channel                   | 15               |
| 15    | 115.84        | 28.73        | Universal                        | 16               |
| 16    | 114.52        | 29.02        | Oceania                          | 16               |
| 17    | 114.56        | 29.03        | Ma Islet                         | 22               |
| 18    | 115.08        | 29.26        | Lushan West Sea National Wetland | 18               |
| 19    | 115.90        | 29.61        | China Mother                     | 19               |
| 20    | 115.93        | 29.65        | Eight Miles Lake                 | 18               |
| 21    | 116.01        | 29.74        | White Water Lake                 | 19               |
| 22    | 116.00        | 29.71        | South Lake                       | 21               |
| 23    | 115.98        | 29.72        | Sweetie Crabapple                | 18               |
| 24    | 116.07        | 29.70        | Fanglan Lake Wetland             | 19               |
| 25    | 116.02        | 29.65        | Sky Flower Well Forest           | 19               |
| 26    | 115.99        | 29.67        | South Hill                       | 21               |
| 27    | 115.97        | 29.55        | Mount Lu                         | 19               |
| 28    | 116.48        | 29.69        | Longgong Cavity                  | 20               |
| 29    | 117.25        | 29.31        | Chang River                      | 22               |
| 30    | 117.17        | 29.30        | Changnan Lake Wetland            | 18               |
| 31    | 117.20        | 29.36        | Sanxian Lake                     | 17               |
| 32    | 117.14        | 28.96        | East Lake                        | 19               |
| 33    | 117.21        | 29.29        | Cloud Gate                       | 12               |
| 34    | 117.19        | 29.28        | Urban Forest                     | 19               |
| 35    | 117.13        | 28.99        | Sky Lake                         | 17               |
| 36    | 117.19        | 29.30        | Jingdezhen People                | 19               |
| 37    | 117.18        | 29.29        | Jingdezhen Kiln Folk             | 18               |
| 38    | 117.15        | 28.98        | Honghao Forest                   | 17               |
| 39    | 117.22        | 29.35        | Fuliang Ecology                  | 19               |
| 40    | 117.17        | 29.31        | Xihewan Beach                    | 13               |
| 41    | 114.54        | 26.77        | Egret Lake National Forests      | 13               |
| 42    | 114.99        | 27.12        | Egret Islet                      | 15               |
| 43    | 115.13        | 27.21        | Jian Lake                        | 15               |
| 44    | 114.91        | 27.02        | Junshan Lake                     | 15               |
| 45    | 114.94        | 27.03        | Pear Mountain                    | 17               |

|    |        |       |                                |    |
|----|--------|-------|--------------------------------|----|
| 46 | 114.98 | 27.13 | Luohu Bay Wetland              | 17 |
| 47 | 115.05 | 27.07 | Qingyuan Mountain Scenery      | 18 |
| 48 | 114.97 | 27.09 | Population Culture Garden      | 17 |
| 49 | 114.98 | 27.06 | Shengang Mountain              | 20 |
| 50 | 114.91 | 26.82 | Taihe                          | 18 |
| 51 | 114.93 | 27.04 | Tianxiang                      | 19 |
| 52 | 114.98 | 27.14 | Zhenjun Mountain               | 17 |
| 53 | 118.24 | 28.67 | Wanliu Islet                   | 19 |
| 54 | 117.96 | 28.44 | Three Rivers                   | 18 |
| 55 | 118.10 | 28.90 | Sanqing Mountain Scenery       | 15 |
| 56 | 117.99 | 28.45 | Yunbi-Peak Forests             | 17 |
| 57 | 117.93 | 28.46 | Citizens                       | 22 |
| 58 | 118.18 | 28.44 | Moon Rabbit Square             | 20 |
| 59 | 117.93 | 28.43 | Sakura                         | 21 |
| 60 | 117.98 | 28.47 | Ziyang                         | 19 |
| 61 | 117.06 | 28.71 | Jin Lake                       | 14 |
| 62 | 117.95 | 28.45 | Luyu                           | 18 |
| 63 | 117.93 | 28.46 | Longtan Lake                   | 17 |
| 64 | 117.41 | 28.32 | Turtle Peak                    | 15 |
| 65 | 114.91 | 27.83 | North Lake                     | 20 |
| 66 | 114.93 | 27.85 | Kongmu River National Wetland  | 16 |
| 67 | 114.92 | 27.81 | Baoshi                         | 20 |
| 68 | 114.76 | 27.74 | Xinyu Fairy Lake               | 21 |
| 69 | 114.90 | 27.80 | Yuan River                     | 22 |
| 70 | 114.66 | 27.82 | Qian Mountain                  | 23 |
| 71 | 114.97 | 27.84 | Gaoxin Forest                  | 13 |
| 72 | 114.94 | 25.87 | Eight Mirrors                  | 12 |
| 73 | 115.98 | 26.51 | Cuiwei Peak National Forests   | 14 |
| 74 | 114.92 | 25.82 | Ganzhou Downtown               | 18 |
| 75 | 115.34 | 26.31 | General                        | 18 |
| 76 | 114.72 | 24.61 | South Wudang Mountain Scenery  | 23 |
| 77 | 114.97 | 25.84 | Wulong Kejia Culture           | 15 |
| 78 | 114.93 | 25.87 | Yugu Stand                     | 13 |
| 79 | 114.92 | 25.80 | Zhangjiang Football Theme      | 16 |
| 80 | 114.95 | 25.37 | Taojiang Wetland               | 22 |
| 81 | 114.37 | 27.81 | Huacheng Cliff Forests         | 11 |
| 82 | 114.41 | 27.82 | Yichun People                  | 14 |
| 83 | 114.44 | 27.82 | Yichun Chandu Culture Expo     | 14 |
| 84 | 114.43 | 27.83 | Yiyang Forests                 | 13 |
| 85 | 114.43 | 27.89 | Chunshun                       | 15 |
| 86 | 114.40 | 27.82 | Yuan Mountain                  | 21 |
| 87 | 114.35 | 27.94 | Zhuo River Scenic Spot         | 21 |
| 88 | 114.44 | 28.09 | Dragon Lake                    | 22 |
| 89 | 113.86 | 27.58 | Ten Miles Flower Creek Wetland | 23 |
| 90 | 113.85 | 27.63 | Pingxiang People               | 18 |
| 91 | 114.02 | 27.62 | Ancient Mountain               | 21 |
| 92 | 113.88 | 27.60 | Anyuan National Forests        | 21 |
| 93 | 113.85 | 27.65 | Fall Harvest Uprising          | 17 |

|    |        |       |                       |      |
|----|--------|-------|-----------------------|------|
| 94 | 113.88 | 27.67 | Cui Lake              | 10   |
| 95 | 114.03 | 27.63 | Luxi Lion Rock        | 22   |
| 96 | 113.85 | 27.68 | Pingshui Lake Wetland | 14   |
| 97 | 113.86 | 27.64 | Goose Lake            | 21   |
| 98 | 113.89 | 27.66 | Yu Lake               | 23   |
|    |        |       | Total                 | 1749 |

**Table S2.** List of cultural ecosystem service values in green and blue spaces of urban wetland parks in Jiangxi province, China.

| Order | Park name                        | Green (10 <sup>3</sup> \$ yr <sup>-1</sup> ) | Blue (10 <sup>3</sup> \$ yr <sup>-1</sup> ) |
|-------|----------------------------------|----------------------------------------------|---------------------------------------------|
| 1     | Ganjiang Citizens                | 7.406                                        | 1.751                                       |
| 2     | Honggu Shoal Wetland             | 6.721                                        | 0.000 <sup>1</sup>                          |
| 3     | Riverside Chinese Rose           | 3.632                                        | 0.000                                       |
| 4     | Elephant Lake Wetland            | 123.996                                      | 118.200                                     |
| 5     | Eight Hermits Mei Lake           | 21.606                                       | 3.251                                       |
| 6     | Nanchang People                  | 0.444                                        | 0.000                                       |
| 7     | Aixi Lake Forest Wetland         | 92.523                                       | 213.943                                     |
| 8     | Yao Lake Wetland                 | 35.137                                       | 0.627                                       |
| 9     | Chengbi Lake                     | 10.536                                       | 23.372                                      |
| 10    | Lingxiu Lake                     | 1.514                                        | 2.234                                       |
| 11    | Meiling National Forest          | 34569.163                                    | 600.648                                     |
| 12    | Barrow Hill Ecology              | 12.389                                       | 0.000                                       |
| 13    | Houtian Sands                    | 13.785                                       | 0.063                                       |
| 14    | Phenix Channel                   | 184.198                                      | 5.922                                       |
| 15    | Universal                        | 24.167                                       | 0.000                                       |
| 16    | Oceania                          | 41.076                                       | 0.286                                       |
| 17    | Ma Islet                         | 12.331                                       | 0.000                                       |
| 18    | Lushan West Sea National Wetland | 0.525                                        | 1.247                                       |
| 19    | China Mother                     | 72.263                                       | 0.123                                       |
| 20    | Eight Miles Lake                 | 1.648                                        | 0.031                                       |
| 21    | White Water Lake                 | 1.973                                        | 0.553                                       |
| 22    | South Lake                       | 20.729                                       | 0.014                                       |
| 23    | Sweetie Crabapple                | 6.941                                        | 0.042                                       |
| 24    | Fanglan Lake Wetland             | 58.190                                       | 60.881                                      |
| 25    | Sky Flower Well Forest           | 150.609                                      | 0.243                                       |
| 26    | South Hill                       | 38.504                                       | 0.181                                       |
| 27    | Mount Lu                         | 25764.144                                    | 31.519                                      |
| 28    | Longgong Cavity                  | 1680.394                                     | 7.300                                       |
| 29    | Chang River                      | 4.878                                        | 0.000                                       |
| 30    | Changnan Lake Wetland            | 1.595                                        | 1.604                                       |
| 31    | Sanxian Lake                     | 2.097                                        | 8.774                                       |
| 32    | East Lake                        | 15.429                                       | 3.669                                       |
| 33    | Cloud Gate                       | 3.236                                        | 0.000                                       |
| 34    | Urban Forest                     | 38.919                                       | 0.000                                       |
| 35    | Sky Lake                         | 6.189                                        | 3.203                                       |
| 36    | Jingdezhen People                | 3.031                                        | 0.000                                       |
| 37    | Jingdezhen Kiln Folk             | 45.737                                       | 0.337                                       |

|    |                               |           |          |
|----|-------------------------------|-----------|----------|
| 38 | Honghao Forest                | 20.479    | 2.962    |
| 39 | Fuliang Ecology               | 4.278     | 0.000    |
| 40 | Xihewan Beach                 | 0.064     | 1.903    |
| 41 | Egret Lake National Forests   | 12773.700 | 355.742  |
| 42 | Egret Islet                   | 1.986     | 0.000    |
| 43 | Jian Lake                     | 0.696     | 0.610    |
| 44 | Junshan Lake                  | 16.611    | 40.521   |
| 45 | Pear Mountain                 | 16.636    | 1.055    |
| 46 | Luohu Bay Wetland             | 8.448     | 2.375    |
| 47 | Qingyuan Mountain Scenery     | 236.334   | 6.348    |
| 48 | Population Culture Garden     | 6.155     | 1.065    |
| 49 | Shengang Mountain             | 27.935    | 0.000    |
| 50 | Taihe                         | 29.377    | 5.018    |
| 51 | Tianxiang                     | 1.388     | 2.431    |
| 52 | Zhenjun Mountain              | 78.119    | 0.000    |
| 53 | Wanliu Islet                  | 6.290     | 0.000    |
| 54 | Three Rivers                  | 0.425     | 0.000    |
| 55 | Sanqing Mountain Scenery      | 1731.601  | 0.000    |
| 56 | Yunbi-Peak Forests            | 258.884   | 0.000    |
| 57 | Citizens                      | 0.227     | 0.000    |
| 58 | Moon Rabbit Square            | 0.114     | 0.000    |
| 59 | Sakura                        | 0.112     | 0.000    |
| 60 | Ziyang                        | 3.550     | 0.000    |
| 61 | Jin Lake                      | 8.340     | 0.604    |
| 62 | Luyu                          | 2.750     | 1.302    |
| 63 | Longtan Lake                  | 28.841    | 3.063    |
| 64 | Turtle Peak                   | 2858.992  | 21.390   |
| 65 | North Lake                    | 8.236     | 6.515    |
| 66 | Kongmu River National Wetland | 30.114    | 15.449   |
| 67 | Baoshi                        | 23.642    | 0.095    |
| 68 | Xinyu Fairy Lake              | 6926.140  | 2240.492 |
| 69 | Yuan River                    | 1.357     | 0.237    |
| 70 | Qian Mountain                 | 17.813    | 0.000    |
| 71 | Gaoxin Forest                 | 5.832     | 0.142    |
| 72 | Eight Mirrors                 | 2.669     | 0.384    |
| 73 | Cuiwei Peak National Forests  | 234.543   | 0.000    |
| 74 | Ganzhou Downtown              | 19.232    | 5.136    |
| 75 | General                       | 1.673     | 0.032    |
| 76 | South Wudang Mountain Scenery | 327.743   | 0.000    |
| 77 | Wulong Kejia Culture          | 22.574    | 2.963    |
| 78 | Yugu Stand                    | 0.838     | 0.000    |
| 79 | Zhangjiang Football Theme     | 12.915    | 0.000    |
| 80 | Taojiang Wetland              | 57.902    | 45.472   |
| 81 | Huacheng Cliff Forests        | 13.446    | 0.152    |
| 82 | Yichun People                 | 0.444     | 0.000    |
| 83 | Yichun Chandu Culture Expo    | 93.179    | 1.713    |
| 84 | Yiyang Forests                | 105.963   | 0.000    |
| 85 | Chunshun                      | 0.116     | 4.295    |

---

|    |                                |          |       |
|----|--------------------------------|----------|-------|
| 86 | Yuan Mountain                  | 57.725   | 1.144 |
| 87 | Zhuo River Scenic Spot         | 2915.789 | 3.979 |
| 88 | Dragon Lake                    | 2.974    | 5.352 |
| 89 | Ten Miles Flower Creek Wetland | 8.820    | 1.027 |
| 90 | Pingxiang People               | 0.444    | 0.000 |
| 91 | Ancient Mountain               | 38.046   | 0.000 |
| 92 | Anyuan National Forests        | 58.201   | 0.110 |
| 93 | Fall Harvest Uprising          | 2.839    | 0.000 |
| 94 | Cui Lake                       | 8.141    | 0.933 |
| 95 | Luxi Lion Rock                 | 16.728   | 0.000 |
| 96 | Pingshui Lake Wetland          | 14.647   | 2.691 |
| 97 | Goose Lake                     | 8.658    | 0.282 |
| 98 | Yu Lake                        | 4.285    | 0.163 |

---

<sup>1</sup> 0.000 values for blue space are small values near zero but not zero.
